# Supplementary material
Source: PubMed Central journal article supplement (PMC4196984)
Supplement: embr0015-0801-sd1.pdf [file embr0015-0801-sd1.pdf]

## Supplementary Fig S1

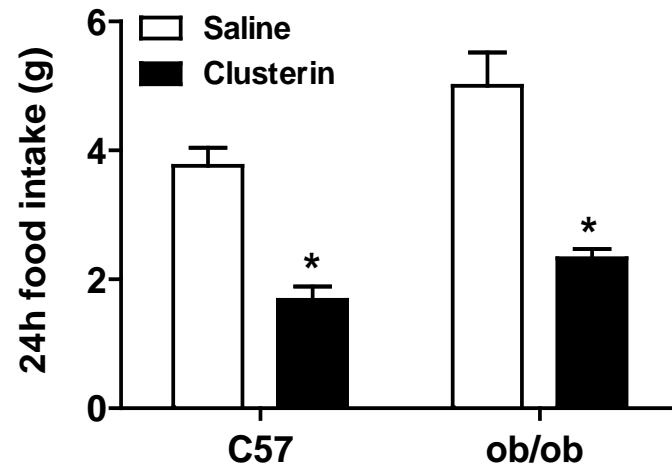

The effects of ICV injection of clusterin (1  $\mu$ g) on food intake in 8 weeks-old C57 and ob/ob mice (n=5-6 per group). Either saline or clusterin was administered in the 3<sup>rd</sup> ventricle in overnight-fasted mice. Food intake was monitored for 24 h following ICV injection. Data are the mean  $\pm$  SEM. Comparison between groups were analyzed using two-way ANOVA followed by a *post-hoc* LSD test. \* $P < 0.01$  vs. saline.
