# Supplementary material
Source: PubMed Central journal article supplement (PMC4196984)
Supplement: embr0015-0801-sd3.pdf [file embr0015-0801-sd3.pdf]

## Supplementary Fig S3

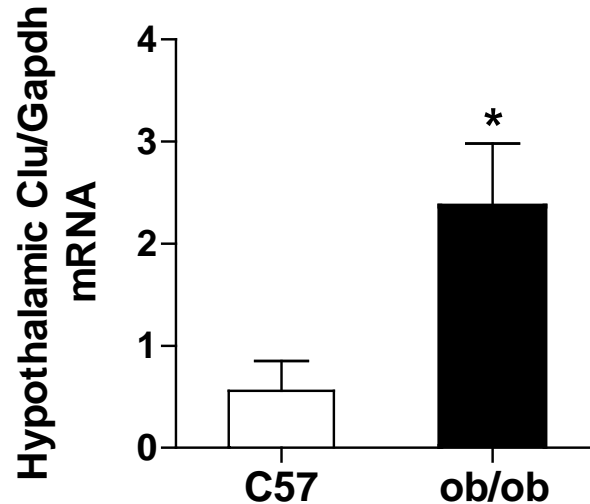

Hypothalamic clusterin mRNA expression levels in 9 weeks-old C57 mice and ob/ob mice (n = 5). Mice were sacrificed following a 5 h-fast. Mediobasal hypothalamus was collected to measure clusterin mRNA levels using real time PCR. Data are the mean  $\pm$  SEM. Comparison between groups were analyzed using the Student's t-test. \* $P < 0.05$  vs. C57 mice.
