# Supplementary material
Source: PubMed Central journal article supplement (PMC4196984)

Fig 1D.

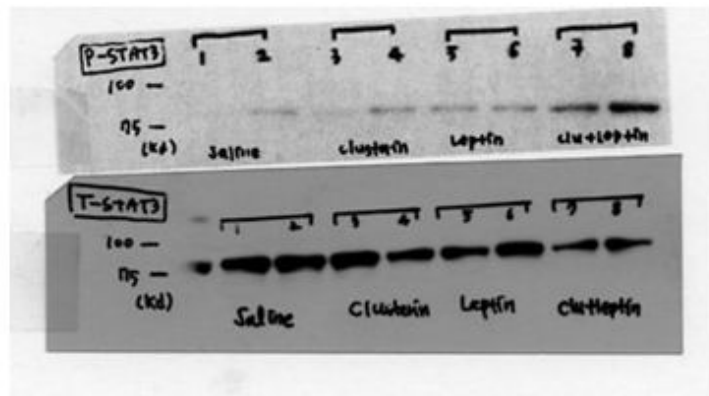

Supplement: embr0015-0801-sd5.pdf [file embr0015-0801-sd5.pdf]

Fig 2E.

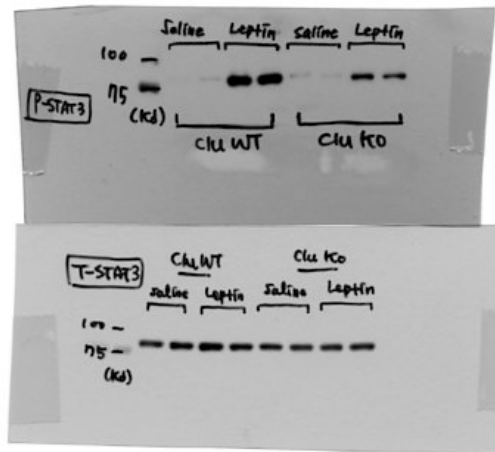

Fig 2G.

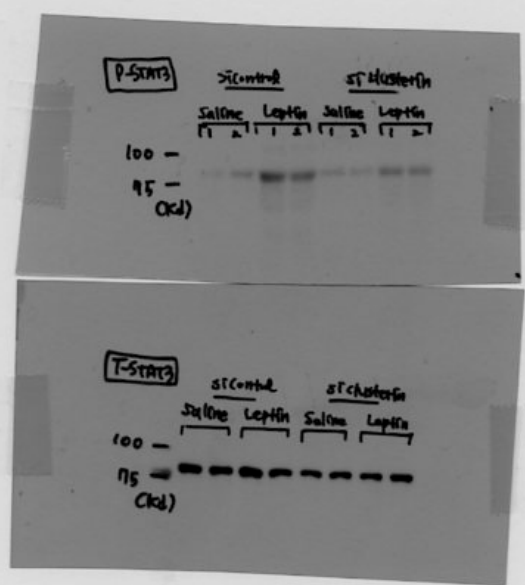

Supplement: embr0015-0801-sd6.pdf [file embr0015-0801-sd6.pdf]

Fig 4B.

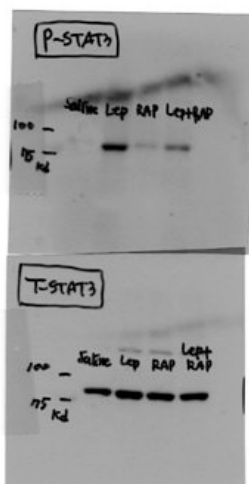

Fig 4 D.

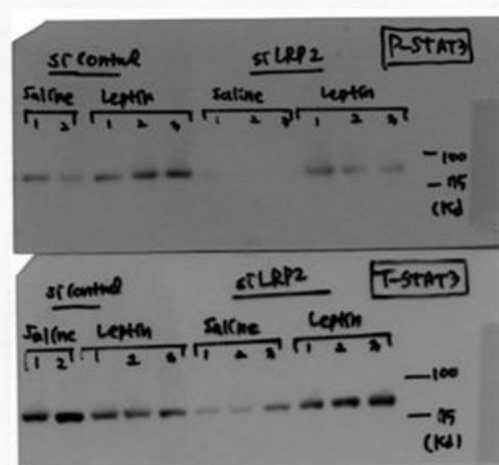

Supplement: embr0015-0801-sd7.pdf [file embr0015-0801-sd7.pdf]
